# Supplementary material
Source: publisher site journal article supplement (https://www.spandidos-publications.com/4305/downloadSupplementary)
Supplement: Supplementary file 1 [file downloadSupplementary]

## Sheet: Supplementary File 10
Table SXIII. The number of genes commonly exhibited significant differences in both expression levels and splicing events.
Gene	logFC	logCPM	P-value	FDR	siCtrl_1st	siCtrl_2nd	siCtrl_3rd	siDEK_1st	siDEK_2nd	siDEK_3rd	Symbol	Chr	Gene type	Description
ENSG00000225177.5	-0.872343	1.61975	3.91307e-07	0.000229373	4.2	4.08	3.85	2.44	2.25	2.02	RP11-390P2.4	chr6	antisense	--
ENSG00000269292.1	0.890059	-0.90081	0.00663385	0.291308	0.72	0.76	1.54	1.83	2.07	2.15	CTB-12A17.3	chr19	antisense	--
ENSG00000116285.12	-0.785906	7.10781	2.8973e-11	3.19282e-08	48.52	31.61	39.9	27.89	21.96	20.53	ERRFI1	chr1	protein_coding	ERBB receptor feedback inhibitor 1
ENSG00000239521.7	0.59305	0.57426	0.00481843	0.245375	0.31	0.37	0.44	0.68	0.52	0.56	GATS	chr7	protein_coding	GATS, stromal antigen 3 opposite strand
ENSG00000136305.11	-1.00172	-0.637643	0.00170436	0.141229	0.17	0.26	0.31	0.13	0.1	0.15	CIDEB	chr14	protein_coding	cell death-inducing DFFA-like effector b
ENSG00000070669.16	-0.749249	7.73955	1.85573e-10	1.8259e-07	120.69	97.63	89.63	74.77	59.77	51.06	ASNS	chr7	protein_coding	asparagine synthetase (glutamine-hydrolyzing)
ENSG00000213199.7	2.03035	-2.17726	0.000715668	0.0813873	0.02	0.03	0.03	0.06	0.13	0.14	ASIC3	chr7	protein_coding	acid sensing (proton gated) ion channel 3
ENSG00000143450.14	-0.685094	0.185279	0.00389274	0.219713	0.37	0.27	0.27	0.26	0.13	0.17	OAZ3	chr1	protein_coding	ornithine decarboxylase antizyme 3
ENSG00000173818.16	0.645291	2.99056	3.89402e-06	0.00165101	1.23	1.43	1.31	2.07	2.06	2.15	ENDOV	chr17	protein_coding	endonuclease V
ENSG00000203965.12	-0.662985	1.48467	0.000153668	0.0280369	1.42	1.18	1.51	0.91	0.7	1.03	EFCAB7	chr1	protein_coding	EF-hand calcium binding domain 7
